# Supplementary material for: A computational study of tri-s-triazine-based molecules as ambipolar host materials for phosphorescent blue emitters: effective geometric and electronic tuning
Source: Royal Society of Chemistry journal article supplement (doi:10.1039/c4tc02269f), 2015-01-01
Supplement: c4tc02269f1.pdf [file c4tc02269f1.pdf]

**Computational study on tri-s-triazine-based molecules as ambipolar  
host materials for phosphorescent blue emitters: effectively  
geometric and electronic tuning**

Jing Li<sup>1</sup>, Zhaomin Nie<sup>1</sup>, Hai Li<sup>2\*</sup>, Yiming Peng<sup>1</sup>, Ziyuan Wang<sup>1</sup>, Zhirui Mai<sup>1</sup>, Wenxu  
Zheng<sup>1\*</sup>

1 College of Materials and Energy, South China Agricultural University, Guangzhou  
510642, China

2 College of electronic engineering, South China Agricultural University, Guangzhou  
510642, China

\*Corresponding Authors

E-mail address:

lee.361@163.com; Tel.:+86 2085280324; Fax: +86 2085285026

wzheng@scau.edu.cn; Tel.:+86 2085280325; Fax: +86 2085285026

Figure S11 To take insight into this geometric effect, the three conformations of A by fixing the N8-C9-N14-C15 dihedral angles to 30, 60 and 90 degree.

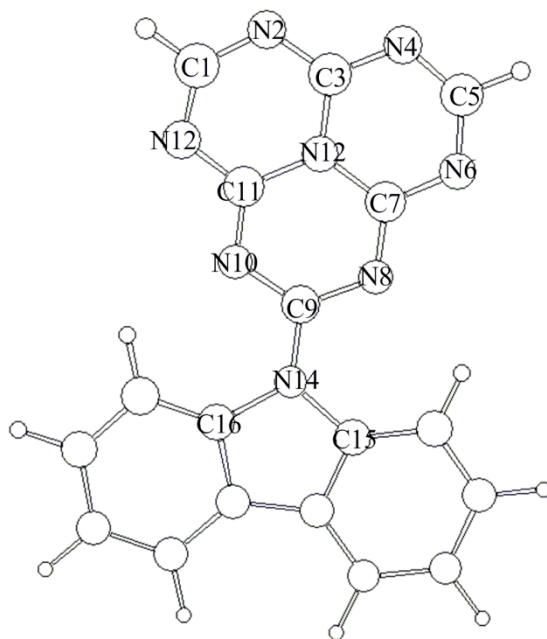

Table SI1 NBO analysis on the ground state and excited state of four conformations of molecule A.

| S0            |           |              |                           | T1            |           |              |                           |
|---------------|-----------|--------------|---------------------------|---------------|-----------|--------------|---------------------------|
| Conformation* | Donor NBO | Acceptor NBO | E <sup>(2)</sup> kcal/mol | Conformation* | Donor NBO | Acceptor NBO | E <sup>(2)</sup> kcal/mol |
| plane         | LP(1)N14  | BD*(2)C9-N10 | 67.52                     | plane         | LP(1)N14  | BD*(2)C9-N10 | 27.37                     |
| 30            | LP(1)N14  | BD*(2)C9-N10 | 50.96                     | 30            | LP(1)N14  | BD*(2)C9-N10 | --                        |
| 60            | LP(1)N14  | BD*(2)C9-N10 | 6.37                      | 60            | LP(1)N14  | BD*(2)C9-N10 | --                        |
| vertical      | --        | --           | --                        | vertical      | --        | --           | --                        |

\*obtained by constraining only the dihedral angle between tri-s-triazine and carbazole planes to 0, 30, 60 and 90 degree.

Table SI2 The E<sub>T</sub> values and the energies of HOMO/LUMO and HOMO/LUMO gap for substituted carbazole and tri-s-triazine molecules.

| Molecules                      | E <sub>T</sub> | HOMO  | LUMO  | E <sub>g</sub> |
|--------------------------------|----------------|-------|-------|----------------|
| Cbz                            | 3.18           | -5.44 | -0.64 | 4.80           |
| cbz-F                          | 3.11           | -5.55 | -1.08 | 4.47           |
| cbz-CN                         | 3.24           | -7.43 | -1.71 | 5.72           |
| cbz-CH <sub>3</sub>            | 3.15           | -5.21 | -0.60 | 4.61           |
| cbz-NH <sub>2</sub>            | 2.56           | -4.16 | -0.32 | 3.84           |
| tri-s-triazine                 | 2.62           | -7.07 | -3.16 | 3.90           |
| tri-s-triazine-NO <sub>2</sub> | 2.35           | -8.17 | -4.33 | 3.84           |
| tri-s-triazine-NH <sub>2</sub> | 3.05           | -6.33 | -1.79 | 4.53           |
| tri-s-triazine-CH <sub>3</sub> | 2.71           | -6.77 | -2.76 | 4.01           |
